# Supplementary material for: Malnutrition assessment methods in adult patients with tuberculosis: a systematic review
Source: HighWire-hosted journal article supplement (doi:10.1136/bmjopen-2021-049777), 2021-12-01
Supplement: bmjopen-2021-049777supp001_data_supplement.pdf [file bmjopen-2021-049777supp001_data_supplement.pdf]

**Supplement material 1 - Details of search strategy****Embase**

('malnutrition'/exp OR 'nutritional status'/exp OR Malnutrition:ab,ti OR Malnourish\*:ab,ti OR 'Nutritional Deficienc\*':ab,ti OR Undernutrition:ab,ti OR Undernourish\*:ab,ti OR 'Nutritional Status':ab,ti OR 'Nutrition Status':ab,ti)

AND

('tuberculosis'/exp OR Tuberculosis:ab,ti OR TB:ab,ti OR tuberculoses:ab,ti) NOT ('animal'/exp NOT 'human'/exp) NOT 'child'/exp NOT 'review'/exp

**Pubmed**

("Malnutrition"[Mesh] OR Malnutrition [tiab] OR Malnourish\* [tiab] OR Nutritional Deficienc\* [tiab] OR Undernutrition [tiab] OR Undernourish\* [tiab] OR "Nutritional Status"[Mesh] OR Nutritional Status [tiab] OR Nutrition Status [tiab])

AND

("Tuberculosis"[Mesh] OR Tuberculosis [tiab] OR TB [tiab] OR tuberculoses [tiab]) NOT ("animals"[MeSH] NOT "humans"[MeSH]) NOT "Child"[Mesh] NOT "Review" [Publication Type]

**Cinahl**

((MH "Malnutrition" OR MH "Nutritional Status" OR TI (Malnutrition OR Malnourish\* OR Nutritional Deficienc\* OR Undernutrition OR Undernourish\* OR Nutritional Status OR Nutrition Status) OR AB (Malnutrition OR Malnourish\* OR Nutritional Deficienc\* OR Undernutrition OR Undernourish\* OR Nutritional Status OR Nutrition Status)) AND ((MH "Tuberculosis+" OR TI (tuberculosis OR tb OR tuberculoses) OR AB (tuberculosis OR tb OR tuberculoses))
