# Supplementary material for: Malnutrition assessment methods in adult patients with tuberculosis: a systematic review
Source: HighWire-hosted journal article supplement (doi:10.1136/bmjopen-2021-049777), 2021-12-01
Supplement: bmjopen-2021-049777supp002_data_supplement.pdf [file bmjopen-2021-049777supp002_data_supplement.pdf]

Supplement material 2. Details of included studies and risk of bias assessment

| First author          | Year of public<br>ation | Year(s)<br>of data<br>collecti<br>on | Country         | Rationale | Aim of<br>malnutrition<br>assessment         | Assessment method                           | Clear cut-<br>off | Maln* in<br>results | Maln* in<br>discussio<br>n | Risk of bias | Number of<br>in/out<br>patients        | HIV<br>coinfection | Susceptibili<br>ty | Type of TB                                |
|-----------------------|-------------------------|--------------------------------------|-----------------|-----------|----------------------------------------------|---------------------------------------------|-------------------|---------------------|----------------------------|--------------|----------------------------------------|--------------------|--------------------|-------------------------------------------|
| Martins <sup>24</sup> | 2009                    | 2005-<br>2006                        | Timor-Leste     | +         | Secondary,<br>part of clinical<br>outcome    | BMI < 18.5 kg/m <sup>2</sup>                | -                 | +                   | +                          | medium       | 270<br>outpatients                     | unknown            | unknown            | pulmonary                                 |
| Pakasi <sup>25</sup>  | 2009                    | unknow<br>n                          | Indonesia       | ++        | Primary,<br>prevalence<br>and<br>association | BMI < 18.5 kg/m <sup>2</sup>                | ++                | ++                  | ++                         | very low     | 121<br>outpatients                     | unknown            | unknown            | pulmonary                                 |
| Ulasli <sup>26</sup>  | 2009                    | 2001-<br>2006                        | Turkey          | +         | Secondary,<br>association                    | BMI < 20.0 kg/m <sup>2</sup>                | ++                | +                   | +                          | low          | 24 inpatients                          | unknown            | unknown            | pulmonary<br>and/or<br>extra<br>pulmonary |
| Kim <sup>27</sup>     | 2010                    | 2005-<br>2006                        | South-<br>Korea | ++        | Primary,<br>malnutrition<br>etiology         | PIBW, BMI, Albumin,<br>TLC, Cholesterol, Hb | ++                | ++                  | ++                         | very low     | 23, unknown<br>type of<br>patients     | unknown            | unknown            | pulmonary                                 |
| Khoharo <sup>28</sup> | 2010                    | 2007-<br>2008                        | Pakistan        | -         | Secondary,<br>risk factor                    | BMI < 18.5 kg/m <sup>2</sup>                | ++                | +                   | ++                         | low          | 350,<br>unknown<br>type of<br>patients | unknown            | unknown            | pulmonary                                 |
| Pakasi <sup>29</sup>  | 2010                    | 2004-<br>2005                        | Indonesia       | +         | Secondary,<br>part of clinical<br>outcome    | BMI (no clear cut-<br>off)                  | -                 | +                   | +                          | medium       | 300<br>outpatients                     | unknown            | unknown            | pulmonary                                 |
| Gambhir <sup>30</sup> | 2010                    | 2006-<br>2009                        | India           | -         | Secondary,<br>risk factor                    | BMI <18.5 kg/m <sup>2</sup>                 | ++                | +                   | +                          | medium       | 95 inpatients                          | no                 | unknown            | pulmonary<br>and/or                       |

|                         |      |           |           |    |                                     |                              |    |    |    |          |                               |         |                       |                                  |
|-------------------------|------|-----------|-----------|----|-------------------------------------|------------------------------|----|----|----|----------|-------------------------------|---------|-----------------------|----------------------------------|
|                         |      |           |           |    |                                     |                              |    |    |    |          |                               |         |                       | extra<br>pulmonary               |
| Singla <sup>31</sup>    | 2010 | 2004-2009 | India     | +  | Secondary, risk factor              | BMI < 18.5 kg/m <sup>2</sup> | +  | +  | +  | medium   | 175 in- and outpatients       | no      | unknown               | pulmonary and/or extra pulmonary |
| Mupere <sup>32</sup>    | 2010 | 2002-2008 | Uganda    | ++ | Primary, association                | BMI < 18.5 kg/m <sup>2</sup> | +  | +  | +  | low      | 445, unknown type of patients | 115     | unknown               | pulmonary                        |
| Warmelink <sup>33</sup> | 2010 | 2005-2008 | Nederland | +  | Primary, risk factor                | Change in body weight        | -  | +  | +  | medium   | 192 inpatients                | 15      | MDR patients included | pulmonary and/or extra pulmonary |
| Podewils <sup>34</sup>  | 2011 | 2000-2004 | Latvia    | ++ | Primary, association                | BMI < 18.5 kg/m <sup>2</sup> | ++ | ++ | +  | very low | 995 in- and outpatients       | 32      | only MDR patients     | pulmonary                        |
| De Jong <sup>35</sup>   | 2011 | unknown   | Gambia    | -  | Secondary, part of clinical outcome | BMI < 16 kg/m <sup>2</sup>   | ++ | +  | +  | medium   | 692, unknown type of patients | 56      | unknown               | pulmonary                        |
| Kawai <sup>36</sup>     | 2011 | 2000-2005 | Tanzania  | +  | Primary, follow-up of malnutrition  | BMI < 18.5 kg/m <sup>2</sup> | ++ | +  | +  | low      | 887 outpatients               | 471     | unknown               | pulmonary                        |
| Miyata <sup>37</sup>    | 2011 | unknown   | Japan     | ++ | Primary, prognostic factor          | SGA                          | ++ | ++ | ++ | very low | 39 inpatients                 | unknown | unknown               | pulmonary                        |

|                        |      |           |            |    |                                                   |                                               |    |    |    |          |                                |         |         |           |
|------------------------|------|-----------|------------|----|---------------------------------------------------|-----------------------------------------------|----|----|----|----------|--------------------------------|---------|---------|-----------|
| Mupere <sup>38</sup>   | 2012 | unknown   | Uganda     | -  | Primary, association                              | BMI < 18.5 kg/m <sup>2</sup>                  | ++ | +  | +  | medium   | 747 outpatients                | 539     | unknown | pulmonary |
| Piva <sup>39</sup>     | 2013 | 2008-2009 | Brazil     | ++ | Primary, prevalence                               | BMI < 18.5 kg/m <sup>2</sup>                  | ++ | ++ | ++ | very low | 34 in- and outpatients         | unknown | unknown | pulmonary |
| Islam <sup>40</sup>    | 2013 | 2010-2011 | Bangladesh | ++ | Primary, prevalence                               | BMI < 18.5 kg/m <sup>2</sup> and MUAC < 22 cm | ++ | +  | ++ | very low | 1068, unknown type of patients | unknown | unknown | pulmonary |
| Chittoor <sup>41</sup> | 2013 | unknown   | Mexico     | -  | Secondary, association                            | Self-reported estimate of diet quality        | -  | +  | +  | high     | 75 outpatients                 | unknown | unknown | pulmonary |
| Miyata <sup>42</sup>   | 2013 | unknown   | Japan      | +  | Primary, prognostic factor                        | MNA < 17                                      | ++ | +  | +  | low      | 53 inpatients                  | unknown | unknown | pulmonary |
| Bhargava <sup>3</sup>  | 2013 | 2004-2009 | India      | ++ | Primary, prevalence and association               | BMI < 18.5 kg/m <sup>2</sup>                  | ++ | ++ | ++ | very low | 1695 in- and outpatients       | 39      | unknown | pulmonary |
| Bakari <sup>43</sup>   | 2013 | 2009-2010 | Tanzania   | ++ | Primary, prevalence and follow-up of malnutrition | BMI < 18.5 kg/m <sup>2</sup>                  | ++ | +  | +  | low      | 43 outpatients                 | 43      | unknown | pulmonary |
| Ismawati <sup>44</sup> | 2013 | 2011-2012 | Indonesia  | +  | Secondary, part of clinical outcome               | BMI (no clear cut-off)                        | -  | +  | +  | medium   | 30, unknown type of patients   | unknown | unknown | pulmonary |
| Miyata <sup>45</sup>   | 2013 | unknown   | Japan      | ++ | Primary, prognostic factor                        | MUST                                          | ++ | +  | +  | low      | 57 inpatients                  | unknown | unknown | pulmonary |

|                                |      |           |           |    |                                                 |                                                               |    |    |    |          |                              |         |                                         |                               |
|--------------------------------|------|-----------|-----------|----|-------------------------------------------------|---------------------------------------------------------------|----|----|----|----------|------------------------------|---------|-----------------------------------------|-------------------------------|
| Maeda <sup>46</sup>            | 2014 | 2007-2009 | Vietnam   | -  | Secondary, association                          | BMI ≤ 18.5 kg/m <sup>2</sup>                                  | ++ | +  | +  | medium   | 465 outpatients              | 38      | Including different types of resistance | pulmonary                     |
| Oliveira <sup>47</sup>         | 2014 | 2007-2010 | Brazil    | ++ | Secondary, association                          | TST<br>AMA                                                    | +  | ++ | ++ | very low | 166 inpatients               | 31      | unknown                                 | pulmonary                     |
| Tian <sup>48</sup>             | 2014 | 2000-2001 | China     | -  | Secondary, risk factor                          | BMI < 18.5 kg/m <sup>2</sup><br>and/or serum albumin < 30 g/L | ++ | +  | +  | medium   | 160 in- and outpatients      | 43      | unknown                                 | pulmonary                     |
| Kumar <sup>49</sup>            | 2014 | 2011-2014 | India     | +  | Primary, prognostic factor                      | BMI (no clear cut-off)                                        | -  | +  | +  | medium   | 376 outpatients              | unknown | Only MDR                                | pulmonary                     |
| Bacelo <sup>50</sup>           | 2015 | 2008-2013 | Brazil    | ++ | Primary, follow-up of malnutrition intervention | Multiple anthropometric and biochemical biomarkers            | ++ | ++ | ++ | very low | 68, unknown type of patients | 22      | unknown                                 | Pulmonary and extra pulmonary |
| Golemba <sup>51</sup>          | 2015 | 2011-2014 | Argentina | -  | Secondary, association                          | BMI ≤ 20 kg/m <sup>2</sup>                                    | ++ | +  | +  | medium   | 75 inpatients                | 0       | unknown                                 | pulmonary                     |
| Te Brake <sup>52</sup>         | 2015 | unknown   | Indonesia | ++ | Primary, prognostic factor                      | BMI < 18.5 kg/m <sup>2</sup>                                  | ++ | +  | ++ | very low | 36 outpatients               | 0       | unknown                                 | pulmonary                     |
| Medellin-Garibay <sup>53</sup> | 2015 | unknown   | Mexico    | -  | Secondary, association                          | BMI < 18.49 kg/m <sup>2</sup>                                 | +  | +  | +  | medium   | 48, unknown type of patients | 0       | unknown                                 | Pulmonary and extrapulmonary  |
| Ezeamama <sup>54</sup>         | 2015 | 2004-2008 | Uganda    | ++ | Secondary, association                          | BMI < 18.5 kg/m <sup>2</sup>                                  | ++ | ++ | ++ | very low | 208 outpatients              | 208     | unknown                                 | pulmonary                     |

|                            |      |           |              |   |                                     |                              |    |    |    |          |                               |         |                          |                              |
|----------------------------|------|-----------|--------------|---|-------------------------------------|------------------------------|----|----|----|----------|-------------------------------|---------|--------------------------|------------------------------|
| McLachlan <sup>55</sup>    | 2016 | 2014      | South Africa | - | Secondary, association              | BMI < 18.5 kg/m <sup>2</sup> | ++ | -  | +  | medium   | 105 inpatients                | 74      | Susceptible and MDR      | Pulmonary and extrapulmonary |
| Gebrecherko <sup>56</sup>  | 2016 | 2015      | Ethiopia     | + | Secondary, risk factor              | BMI < 18.5 kg/m <sup>2</sup> | ++ | +  | +  | Low      | 15 outpatients                | 4       | No rifampicin resistance | pulmonary                    |
| Araújo-Mariz <sup>57</sup> | 2016 | 2007-2012 | Brazil       | - | Secondary, prognostic factor        | BMI < 18.5 kg/m <sup>2</sup> | ++ | +  | +  | medium   | 173, unknown type of patients | 173     | unknown                  | unknown                      |
| Buntoro <sup>58</sup>      | 2016 | unknown   | Indonesia    | + | Primary, part of clinical outcome   | BMI <18.5 kg/m <sup>2</sup>  | ++ | ++ | ++ | very low | 72 outpatients                | unknown | unknown                  | pulmonary                    |
| Pandit <sup>59</sup>       | 2016 | 2012-2013 | India        | - | Secondary, prognostic factor        | BMI <20.0 kg/m <sup>2</sup>  | -  | +  | +  | high     | 148, unknown type of patients | unknown | unknown                  | pulmonary                    |
| Abdelbary <sup>60</sup>    | 2017 | 2006-2013 | Mexico       | - | Secondary, risk factor              | Underweight                  | -  | ++ | -  | high     | 8431 outpatients              | 447     | Susceptible and MDR      | pulmonary and extrapulmonary |
| Bhat <sup>61</sup>         | 2017 | 2013      | India        | + | Secondary, association              | BMI < 18.5 kg/m <sup>2</sup> | ++ | +  | +  | low      | 267 outpatients               | 0       | unknown                  | pulmonary                    |
| Hochberg <sup>62</sup>     | 2017 | 2014-2016 | India        | - | Primary, prevalence                 | BMI < 18.5 kg/m <sup>2</sup> | ++ | ++ | ++ | low      | 409 outpatients               | 1       | Only normal susceptible  | pulmonary                    |
| Piparva <sup>63</sup>      | 2018 | 2014-2015 | India        | - | Secondary, part of clinical outcome | BMI < 18.5 kg/m <sup>2</sup> | ++ | ++ | ++ | low      | 108 inpatients                | 5       | only MDR                 | pulmonary                    |

|                                  |      |           |                              |    |                                       |                              |   |    |    |          |                              |         |         |                              |
|----------------------------------|------|-----------|------------------------------|----|---------------------------------------|------------------------------|---|----|----|----------|------------------------------|---------|---------|------------------------------|
| Gurung <sup>64</sup>             | 2018 | 2016      | Nepal                        | ++ | Primary, prevalence                   | BMI (no clear cut-off)       | - | ++ | ++ | low      | 133 outpatients              | 1       | unknown | pulmonary and extrapulmonary |
| Pande <sup>65</sup>              | 2018 | 2015-2016 | India                        | -  | Secondary, prevalence and association | BMI < 18.4 kg/m <sup>2</sup> | + | +  | +  | medium   | 728 inpatients               | 53      | unknown | pulmonary and extrapulmonary |
| Rao <sup>66</sup>                | 2018 | 2013-2014 | India                        | -  | Secondary, risk factor                | BMI (no clear cut-off)       | - | +  | ++ | medium   | 220 outpatients              | unknown | unknown | pulmonary                    |
| Sattler <sup>67</sup>            | 2018 | unknown   | 4 continents, 26 study sites | +  | Primary, association                  | BMI < 18.5 kg/m <sup>2</sup> | - | +  | +  | medium   | 51, unknown type of patients | 51      | unknown | pulmonary                    |
| Kirchmann Lazzari <sup>68</sup>  | 2018 | unknown   | Brazil                       | ++ | Primary, prevalence                   | BMI TSF MAMC SGA             | + | ++ | ++ | very low | 108 inpatients               | 44      | unknown | pulmonary                    |
| Cheng <sup>69</sup>              | 2019 | 2013-2016 | China                        | -  | Secondary, part of clinical outcome   | BMI < 18 kg/m <sup>2</sup>   | + | +  | -  | high     | 85 inpatients                | 0       | unknown | intestinal                   |
| Cavalheiro Skupien <sup>70</sup> | 2019 | unknown   | Brazil                       | -  | Secondary, association                | BMI ≤ 18.5 kg/m <sup>2</sup> | - | +  | +  | high     | 35 inpatients                | unknown | unknown | pulmonary                    |

|                         |      |             |          |    |                                   |                                                                   |    |    |    |          |                                |      |             |                              |
|-------------------------|------|-------------|----------|----|-----------------------------------|-------------------------------------------------------------------|----|----|----|----------|--------------------------------|------|-------------|------------------------------|
| Abdullahi <sup>71</sup> | 2019 | 2012 - 2016 | Kenya    | +  | Primary, association              | BMI < 18.5 kg/m <sup>2</sup>                                      | ++ | ++ | -  | low      | 10717 outpatients              | 3163 | unknown     | Pulmonary and extrapulmonary |
| Benzekri <sup>72</sup>  | 2019 | 2016 - 2017 | Senegal  | -  | Primary, part of clinical outcome | BMI (no clear cut-off)                                            | -  | ++ | +  | medium   | 26 outpatients                 | 26   | Susceptible | pulmonary                    |
| Chebrolu <sup>73</sup>  | 2019 | unknown     | USA      | ++ | Primary, inclusion criterion      | BMI < 16 kg/m <sup>2</sup>                                        | ++ | +  | +  | low      | 27, unknown type of patients   | 0    | unknown     | Pulmonary and extrapulmonary |
| Da Silva <sup>74</sup>  | 2019 | 2017 - 2018 | Brazil   | +  | Primary, association              | BMI < 18.5 kg/m <sup>2</sup><br>TSF<br>MUAC<br>MAMC<br>BIA<br>FFQ | +  | ++ | ++ | low      | 35, unknown type of patients   | 14   | unknown     | Pulmonary                    |
| Feleke <sup>75</sup>    | 2019 | 2015 - 2018 | Ethiopia | ++ | Primary, prevalence               | BMI < 18.5 kg/m <sup>2</sup>                                      | ++ | ++ | +  | very low | 1681, unknown type of patients | 595  | unknown     | Pulmonary and extrapulmonary |

|                       |      |             |             |    |                                   |                                                                             |    |    |    |          |                               |         |         |                              |
|-----------------------|------|-------------|-------------|----|-----------------------------------|-----------------------------------------------------------------------------|----|----|----|----------|-------------------------------|---------|---------|------------------------------|
| Gashaw <sup>76</sup>  | 2019 | 2015 – 2017 | Ethiopia    | ++ | Primary, prevalence               | BMI ≤ 18.5 kg/m <sup>2</sup><br>MUAC ≤ 23 cm (men)<br>MUAC ≤ 22 cm (women)  | ++ | ++ | ++ | very low | 384, unknown type of patients | unknown | unknown | Pulmonary and extrapulmonary |
| Hoyt <sup>77</sup>    | 2019 | 2015 – 2017 | India       | ++ | Primary, part of clinical outcome | BMI < 18.5 kg/m <sup>2</sup>                                                | ++ | ++ | ++ | very low | 173, unknown type of patients | unknown | unknown | pulmonary                    |
| Hussien <sup>78</sup> | 2019 | 2017 – 2018 | Ethiopia    | ++ | Primary, prevalence               | BMI < 18.5 kg/m <sup>2</sup>                                                | +  | ++ | ++ | very low | 372 inpatients                | 42      | unknown | pulmonary                    |
| Lee <sup>79</sup>     | 2019 | 2016 – 2017 | Philippines | ++ | Primary, prognostic factor        | BMI< 17 kg/m <sup>2</sup><br>MUAC ≤ 20.5 cm (men)<br>MUAC ≤ 18.5 cm (women) | ++ | ++ | ++ | very low | 348 inpatients                | 22      | 31 MDR  | unknown                      |
| Mailu <sup>80</sup>   | 2019 | 2013- 2017  | Kenya       | -  | Primary, prevalence               | BMI < 18.5 kg/m <sup>2</sup>                                                | ++ | ++ | +  | low      | 421409 outpatients            | 134776  | unknown | Pulmonary and extrapulmonary |



|                       |      |             |              |    |                                                                 |                                                                                        |    |    |    |          |                                 |         |         |                              |
|-----------------------|------|-------------|--------------|----|-----------------------------------------------------------------|----------------------------------------------------------------------------------------|----|----|----|----------|---------------------------------|---------|---------|------------------------------|
| Rashak <sup>81</sup>  | 2019 | 2010-2014   | Mexico       | ++ | Primary, prevalence and association                             | BMI < 18.5 kg/m <sup>2</sup> (or BMI ≤ 18.5 kg/m <sup>2</sup> , not clearly described) | -  | ++ | ++ | low      | 5508 , unknown type of patients | 224     | unknown | Pulmonary and extrapulmonary |
| Ren <sup>82</sup>     | 2019 | 2015 – 2017 | China        | ++ | Primary, prevalence                                             | BMI < 18.5 kg/m <sup>2</sup>                                                           | ++ | -  | ++ | low      | 300 in- and outpatients         | unknown | unknown | pulmonary                    |
| Wardani <sup>83</sup> | 2019 | 2016        | Indonesia    | +  | Secondary, risk factor                                          | BMI ≤ 18.5 kg/m <sup>2</sup>                                                           | ++ | +  | -  | medium   | 311 outpatients                 | unknown | unknown | pulmonary                    |
| Wessels <sup>84</sup> | 2019 | 2015        | South Africa | ++ | Secondary, association                                          | BMI < 18.5 kg/m <sup>2</sup> (underweight)                                             | -  | ++ | +  | low      | 100 inpatients                  | 68      | unknown | unknown                      |
| White <sup>85</sup>   | 2019 | 2016 – 2017 | Philippines  | ++ | Primary and secondary, validation of tool and prognostic factor | BMI < 17 kg/m <sup>2</sup>                                                             | ++ | ++ | ++ | very low | 348 inpatients                  | 22      | 31      | unknown                      |

|                        |      |         |              |    |                                           |                              |    |    |    |          |                         |              |              |                              |
|------------------------|------|---------|--------------|----|-------------------------------------------|------------------------------|----|----|----|----------|-------------------------|--------------|--------------|------------------------------|
| Ma'rufi <sup>86</sup>  | 2020 | 2017    | Indonesia    | ++ | Primary, follow-up of malnutrition        | BMI < 18.5 kg/m <sup>2</sup> | ++ | ++ | ++ | very low | 200 outpatients         | 0 (excluded) | 0 (excluded) | pulmonary                    |
| Musuenge <sup>87</sup> | 2020 | unknown | Burkina Faso | ++ | Primary, prevalence and association       | BMI < 18.5 kg/m <sup>2</sup> | ++ | ++ | ++ | Very low | 302 outpatients         | 23           | unknown      | pulmonary                    |
| Seid <sup>88</sup>     | 2020 | 2019    | Ethiopia     | ++ | Primary, prevalence and prognostic factor | BMI < 18.5 kg/m <sup>2</sup> | +  | ++ | ++ | Very low | 284 in- and outpatients | 51           | Unknown      | Pulmonary and extrapulmonary |
| Edwards <sup>89</sup>  | 2020 | 2017    | Philippines  | +  | Primary, prevalence                       | BMI < 17.0 kg/m <sup>2</sup> | +  | ++ | ++ | Very low | 446 outpatients         | 68 (28%)     | Susceptible  | Unknown                      |
| White <sup>90</sup>    | 2020 | 2017    | Philippines  | ++ | Primary, prevalence and association       | BMI < 18.5 kg/m <sup>2</sup> | +  | ++ | ++ | Very low | 637 outpatients         | 74 (24%)     | Unknown      | Unknown                      |

|                      |      |      |       |    |                     |                                                           |    |   |    |     |                               |         |         |                              |
|----------------------|------|------|-------|----|---------------------|-----------------------------------------------------------|----|---|----|-----|-------------------------------|---------|---------|------------------------------|
| Mollah <sup>91</sup> | 2020 | 2018 | India | ++ | Primary, prevalence | BMI < 18.5 kg/m <sup>2</sup><br>MUAC <23 (m) &<br><22 (f) | ++ | - | ++ | Low | 113, unknown type of patients | Unknown | Unknown | Pulmonary and extrapulmonary |
|----------------------|------|------|-------|----|---------------------|-----------------------------------------------------------|----|---|----|-----|-------------------------------|---------|---------|------------------------------|

1

2 **Abbreviations** PIBW: Percent Ideal Body Weight; BMI: Body Mass index; TLC: Total Lymphocyte Count; Hb: Haemoglobin; MUAC: Mid Upper Arm Circumference; MNA: Mini Nutritional Assessment;

3 AMA: Arm Muscle Area; MAMC: Mid Arm Muscle Circumference; TSF: Triceps Skin Fold ; TST: Triceps Skinfold Thickness; SGA: Subjective Global Assessment; BIA: Bio-electrical Impedance Analysis; FFQ: Food

4 Frequency Questionnaire

5 **References**

- 6 3 Bhargava A, Chatterjee M, Jain Y, et al. Nutritional status of adult patients with pulmonary  
7 tuberculosis in rural central India and its association with mortality. *PLoS One* 2013;8:e77979  
8 doi:10.1371/journal.pone.0077979 [doi].
- 9 24 Martins N, Morris P, Kelly PM. Food incentives to improve completion of tuberculosis treatment:  
10 randomised controlled trial in Dili, Timor-Leste. *BMJ* 2009;339:b4248 doi:10.1136/bmj.b4248 [doi].
- 11 25 Pakasi TA, Karyadi E, Dolmans WM, et al. Malnutrition and socio-demographic factors associated  
12 with pulmonary tuberculosis in Timor and Rote Islands, Indonesia. *Int J Tuberc Lung Dis* 2009;13:755-  
13 9.
- 14 26 Ulasli SS, Ulubay G, Arslan NG, et al. Characteristics and Outcomes of End-Stage Renal Disease  
15 Patients With Active Tuberculosis Followed in Intensive Care Units. *Saudi J Kidney Dis Transpl*  
16 2009;20:254-9.
- 17 27 Kim JS, Wilson JM, Lee SR. Dietary implications on mechanisms of sarcopenia: roles of protein,  
18 amino acids and antioxidants. *J Nutr Biochem* 2010;21:1-13 doi:10.1016/j.jnutbio.2009.06.014;  
19 10.1016/j.jnutbio.2009.06.014.
- 20 28 Khoharo HK, Ansari S, Siddiqui AA, et al. Standard antituberculosis drug induced hepatotoxicity:  
21 Do the risk factors matter?. *J Liaquat Uni Med Health Sci* 2010;9:84-7.
- 22 29 Pakasi TA, Karyadi E, Suratih NMD, et al. Zinc and vitamin A supplementation fails to reduce  
23 sputum conversion time in severely malnourished pulmonary tuberculosis patients in Indonesia. *Nutr*  
24 *J* 2010;9:41.
- 25 30 Gambhir HS, Kaushik RM, Kaushik R, et al. Tobacco smoking-associated risk for tuberculosis: a  
26 case-control study. *Int Health* 2010;2:216-22.
- 27 31 Singla R, Sharma SK, Mohan A, et al. Evaluation of risk factors for antituberculosis treatment  
28 induced hepatotoxicity. *Indian J Med Res* 2010;132:81-6.
- 29 32 Mupere E, Zalwango S, Chiunda A, et al. Body composition among HIV-seropositive and HIV-  
30 seronegative adult patients with pulmonary tuberculosis in Uganda. *Ann Epidemiol* 2010;20:210-6.
- 31 33 Warmelink I, van Altena R, ten Hacken N, et al. Nutritional status and vitamin D3 during  
32 antimicrobial treatment. *Lancet* 2011;377:1407-8.
- 33 34 Podewils LJ, Holtz T, Riekstina V, et al. Impact of malnutrition on clinical presentation, clinical  
34 course, and mortality in MDR-TB patients. *Epidemiol Infect* 2011;139:113-20  
35 doi:10.1017/S0950268810000907 [doi].
- 36 35 de Jong BC, Adetifa I, Walther B, et al. Differences between tuberculosis cases infected with  
37 *Mycobacterium africanum*, West African type 2, relative to Euro-American *Mycobacterium*  
38 tuberculosis: an update. *FEMS Immunol Med Microbiol* 2010;58:102-5 doi:10.1111/j.1574-  
39 695X.2009.00628.x [doi].

- 40 36 Kawai K, Villamor E, Mugusi FM, et al. Predictors of change in nutritional and hemoglobin status  
41 among adults treated for tuberculosis in Tanzania. *Int J Tuberc Lung Dis* 2011;15:1380-9  
42 doi:10.5588/ijtld.10.0784 [doi].
- 43 37 Miyata S, Tanaka M, Ihaku D. Subjective global assessment in patients with pulmonary  
44 tuberculosis. *Nutr Clin Pract* 2011;26:55-60 doi:10.1177/0884533610392380 [doi].
- 45 38 Mupere E, Malone L, Zalwango S, et al. Lean tissue mass wasting is associated with increased risk  
46 of mortality among women with pulmonary tuberculosis in urban Uganda. *Ann Epidemiol*  
47 2012;22:466-73.
- 48 39 Piva SG, Costa Mda C, Barreto FR, et al. Prevalence of nutritional deficiency in patients with  
49 pulmonary tuberculosis. *J Bras Pneumol* 2013;39:476-83 doi:10.1590/S1806-37132013000400012  
50 [doi].
- 51 40 Islam QS, Ahmed SM, Islam MA, et al. Beyond drugs: tuberculosis patients in Bangladesh need  
52 nutritional support during convalescence. *Public health action* 2013;3:136-40.
- 53 41 Chittoor G, Arya R, Farook VS, et al. Epidemiologic investigation of tuberculosis in a Mexican  
54 population from Chihuahua State, Mexico: a pilot study. *Tuberculosis (Edinburgh, Scotland)*  
55 2013;93:S71-7.
- 56 42 Miyata S, Tanaka M, Ihaku D. Full mini nutritional assessment and prognosis in elderly patients  
57 with pulmonary tuberculosis. *J Am Coll Nutr* 2013;32:307-11 doi:10.1080/07315724.2013.826114  
58 [doi].
- 59 43 Bakari M, Wamsele J, MacKenzie T, et al. Nutritional status of HIV-infected women with  
60 tuberculosis in Dar es Salaam, Tanzania. *Public health action* 2013;3:224-9.
- 61 44 Ismawati. R., Bambang W, Priatna DY, et al. The effect of zinc, lysine and vitamin a  
62 supplementation to increase cellular immune response of pulmonary tuberculosis patients. *J Trace*  
63 *Elem Med Biol* 2013;27:21.
- 64 45 Miyata S, Tanaka M, Ihaku D. The prognostic significance of nutritional status using malnutrition  
65 universal screening tool in patients with pulmonary tuberculosis. *Nutrition journal* 2013;12:42.
- 66 46 Maeda S, Hang NT, Lien LT, et al. Mycobacterium tuberculosis strains spreading in Hanoi, Vietnam:  
67 Beijing sublineages, genotypes, drug susceptibility patterns, and host factors. *Tuberculosis (Edinb)*  
68 2014;94:649-56 doi:S1472-9792(14)20533-6 [pii].
- 69 47 Oliveira MG, Delogo KN, Oliveira, Hedi Marinho de Melo Gomes de, et al. Anemia in hospitalized  
70 patients with pulmonary tuberculosis. *Jornal brasileiro de pneumologia : publicacao oficial da*  
71 *Sociedade Brasileira de Pneumologia e Tisiologia* 2014;40:403-10.
- 72 48 Tian PW, Wang Y, Shen YC, et al. Different risk factors of recurrent pulmonary tuberculosis  
73 between Tibetan and Han populations in Southwest China. *Eur Rev Med Pharmacol Sci* 2014;18:1482-  
74 6 doi:7406 [pii].
- 75 49 Kumar NSS, Hemraj SK, Dutt RA. Phase angle measurement in pulmonary tuberculosis patients  
76 and control subjects using bio-impedance analysis. *The Indian journal of tuberculosis* 2014;61:224-31.

- 77 50 Bacelo AC, Ramalho A, Brasil PE, et al. Nutritional Supplementation Is a Necessary Complement to  
78 Dietary Counseling among Tuberculosis and Tuberculosis-HIV Patients. *PLoS One* 2015;10:e0134785  
79 doi:10.1371/journal.pone.0134785 [doi].
- 80 51 Golemba AS, Ferreyra FG, Martearena RE, et al. Drug-induced hepatotoxicity and tuberculosis in a  
81 hospital from the Argentinian northeast: cross-sectional study. *Medwave* 2015;15:e6135  
82 doi:10.5867/medwave.2015.04.6135 [doi].
- 83 52 Te Brake LH, Ruslami R, Later-Nijland H, et al. Exposure to total and protein-unbound rifampicin is  
84 not affected by malnutrition in Indonesian tuberculosis patients. *Antimicrob Agents Chemother*  
85 2015;74:986-90 doi:AAC.03485-14 [pii].
- 86 53 Medellin-Garibay SE, Cortez-Espinosa N, Milan-Segovia RC, et al. Clinical Pharmacokinetics of  
87 Rifampin in Patients with Tuberculosis and Type 2 Diabetes Mellitus: Association with Biochemical  
88 and Immunological Parameters. *Antimicrob Agents Chemother* 2015;59:7707-14  
89 doi:10.1128/AAC.01067-15 [doi].
- 90 54 Ezeamama AE, Mupere E, Oloya J, et al. Age, sex, and nutritional status modify the CD4+ T-cell  
91 recovery rate in HIV-tuberculosis co-infected patients on combination antiretroviral therapy. *Int J*  
92 *Infect Dis* 2015;35:73-9 doi:10.1016/j.ijid.2015.04.008 [doi].
- 93 55 McLachlan I, Visser WI, Jordaan HF. Skin conditions in a South African tuberculosis hospital:  
94 Prevalence, description, and possible associations. *Int J Dermatol* 2016;55:1234-41.
- 95 56 Gebrecherkos T, Gelaw B, Tessema B. Smear positive pulmonary tuberculosis and HIV co-infection  
96 in prison settings of North Gondar Zone, Northwest Ethiopia. *BMC Public Health* 2016;16:1091.
- 97 57 Araújo-Mariz C, Lopes EP, Acioli-Santos B, et al. Hepatotoxicity during Treatment for Tuberculosis  
98 in People Living with HIV/AIDS. *PloS one* 2016;11:e0157725.
- 99 58 Buntoro IF, Kristin E, Sumardi. Decrease of liver function after treatment of antituberculosis drugs  
100 in tuberculosis patients with malnutrition and alcohol consumption. *Int J Pharm Pharm Sci*  
101 2016;8:269-73.
- 102 59 Pandit A, Pandey Ak. Liver dysfunction in pulmonary tuberculosis patients on dots: A study and  
103 review. *J Gastroenterol Hepatol Res* 2016;5:2254-60.
- 104 60 Abdelbary BE, Garcia-Viveros M, Ramirez-Oropesa H, et al. Predicting treatment failure, death and  
105 drug resistance using a computed risk score among newly diagnosed TB patients in Tamaulipas,  
106 Mexico. *Epidemiol Infect* 2017;145:3020-34.
- 107 61 Bhat J, Rao VG, Sharma RK, et al. Investigation of the risk factors for pulmonary tuberculosis: A  
108 case-control study among Saharia tribe in Gwalior district, Madhya Pradesh, India. *Indian J Med Res*  
109 2017;146:97-104.
- 110 62 Hochberg NS, Sarkar S, Horsburgh CR, et al. Comorbidities in pulmonary tuberculosis cases in  
111 Puducherry and Tamil Nadu, India: Opportunities for intervention. *PloS one* 2017;12:e0183195.
- 112 63 Piparva KG, Jansari G, Singh AP. Evaluation of treatment outcome and adverse drug reaction of  
113 directly observed treatment (DOT) plus regimen in multidrug-resistant tuberculosis (MDR-TB)  
114 patients at district tuberculosis centre Rajkot. *Perspectives in clinical research* 2018;9:165-9.

- 115 64 Gurung LM, Bhatt LD, Karmacharya I, et al. Dietary Practice and Nutritional Status of Tuberculosis  
116 Patients in Pokhara: A Cross Sectional Study. *Frontiers in nutrition* 2018;5:1-6.
- 117 65 Pande T, Huddart S, Xavier W, et al. Prevalence of diabetes mellitus amongst hospitalized  
118 tuberculosis patients at an Indian tertiary care center: A descriptive analysis. *PloS one*  
119 2018;13:e0200838.
- 120 66 Rao VG, Bhat J, Yadav R, et al. A comparative study of the socio-economic risk factors for  
121 pulmonary tuberculosis in the Saharia tribe of Madhya Pradesh, India. *Trans R Soc Trop Med Hyg*  
122 2018;112:272-8.
- 123 67 Sattler FR, Chelliah D, Wu X, et al. Biomarkers Associated with Death After Initiating Treatment for  
124 Tuberculosis and HIV in Patients with Very Low CD4 Cells. *Pathogens & immunity* 2018;3:46-62.
- 125 68 Lazzari T.K., Forte G.C., Silva D.R. Nutrition Status Among HIV-Positive and HIV-Negative Inpatients  
126 with Pulmonary Tuberculosis. *Nutr.Clin.Prac.* 2018;33:858-64.
- 127 69 Cheng W, Zhang S, Li Y, et al. Intestinal tuberculosis: clinico-pathological profile and the  
128 importance of a high degree of suspicion. *Trop Med Int Health* 2019;24:81-90.
- 129 70 Skupien EC, Lazzari T, Coutinho SE, et al. The relation between leptin and inflammatory markers  
130 with respiratory and peripheral muscle strength in tuberculosis: A case-control study. *Clin Respir J*  
131 2018;12:2559-65.
- 132 71 Abdullahi OA, Ngari MM, Sanga D, et al. Mortality during treatment for tuberculosis; a review of  
133 surveillance data in a rural county in Kenya. *PloS one* 2019;14:e0219191.
- 134 72 Benzekri NA, Sambou JF, Tamba IT, et al. Nutrition support for HIV-TB co-infected adults in  
135 Senegal, West Africa: A randomized pilot implementation study. *PloS one* 2019;14:e0219118.
- 136 73 Chebrolu P., Laux T., Chowdhury S., et al. The risk of refeeding syndrome among severely  
137 malnourished tuberculosis patients in Chhattisgarh, India. *Indian J Tuberc*  
138 2019;<https://doi.org/10.1016/j.ijtb.2019.03.004>.
- 139 74 da Silva LF, Skupien EC, Lazzari T, et al. Advanced glycation end products (AGE) and receptor for  
140 AGE (RAGE) in patients with active tuberculosis, and their relationship between food intake and  
141 nutritional status. *PloS one* 2019;14:e0213991.
- 142 75 Feleke BE, Feleke TE, Biadlegne F. Nutritional status of tuberculosis patients, a comparative  
143 cross-sectional study. *BMC Pulm Med* 2019;19:182.
- 144 76 Gashaw F, Bekele S, Mekonnen Y, et al. High helminthic co-infection in tuberculosis patients with  
145 undernutritional status in northeastern Ethiopia. *Infect Dis Poverty* 2019;8:88.
- 146 77 Hoyt KJ, Sarkar S, White L, et al. Effect of malnutrition on radiographic findings and mycobacterial  
147 burden in pulmonary tuberculosis. *PloS one* 2019;14:e0214011.
- 148 78 Hussien B., Hussen M.M., Seid A., et al. Nutritional deficiency and associated factors among new  
149 pulmonary tuberculosis patients of Bale Zone Hospitals, southeast Ethiopia. *BMC Res Notes*  
150 2019;12:751.

- 151 79 Lee N, White LV, Marin FP, et al. Mid-upper arm circumference predicts death in adult patients  
152 admitted to a TB ward in the Philippines: A prospective cohort study. *PloS one* 2019;14:e0218193.
- 153 80 Mailu EW, Owiti P, Ade S, et al. Tuberculosis control activities in the private and public health  
154 sectors of Kenya from 2013 to 2017: how do they compare?. *Trans R Soc Trop Med Hyg*  
155 2019;113:740-8.
- 156 81 Rashak HA, Sánchez-PÃ©rez HJ, Abdelbary BE, et al. Diabetes, undernutrition, migration and  
157 indigenous communities: tuberculosis in Chiapas, Mexico. *Epidemiol Infect* 2019;147:e71.
- 158 82 Ren Z, Zhao F, Chen H, et al. Nutritional intakes and associated factors among tuberculosis  
159 patients: a cross-sectional study in China. *BMC Infect Dis* 2019;19:907.
- 160 83 Wardani DWSR, Wahono EP. Predominant Determinants of Delayed Tuberculosis Sputum  
161 Conversion in Indonesia. *Indian J Commun Med* 2019;44:53-7.
- 162 84 Wessels J, Walsh CM, Nel M. Smoking habits and alcohol use of patients with tuberculosis at  
163 Standerton Tuberculosis Specialised Hospital, Mpumalanga, South Africa. *Health SA Gesondheid*  
164 2019;24:1146.
- 165 85 White LV, Edwards T, Lee N, et al. Co-morbidities in filipino persons with tuberculosis: A cross-  
166 sectional study in urban and rural public TBDOTS facilities. *Trans R Soc Trop Med Hyg* 2019;113:S210.
- 167 86 Ma'rufi I, Ali K, Jati SK, et al. Improvement of Nutritional Status among Tuberculosis Patients by  
168 Channa striata Supplementation: A True Experimental Study in Indonesia. *BioMed Research*  
169 *International* 2020:1-10.
- 170 87 Musuenge BB, Poda GG, Chen PC. Nutritional Status of Patients with Tuberculosis and Associated  
171 Factors in the Health Centre Region of Burkina Faso. *Nutrients* 2020;12:10.3390/nu12092540  
172 doi:E2540 [pii].
- 173 88 Seid G, Ayele M. Undernutrition and Mortality among Adult Tuberculosis Patients in Addis Ababa,  
174 Ethiopia. *Adv Prev Med* 2020;2020:5238010 doi:10.1155/2020/5238010 [doi].
- 175 89 Edwards T, White LV, Lee N, et al. Effects of comorbidities on quality of life in Filipino people with  
176 tuberculosis. *The international journal of tuberculosis and lung disease : the official journal of the*  
177 *International Union against Tuberculosis and Lung Disease* 2020;24:712-9.
- 178 90 White LV, Edwards T, Lee N, et al. Patterns and predictors of co-morbidities in Tuberculosis: A  
179 cross-sectional study in the Philippines. *Sci Rep* 2020;10:4100.
- 180 91 Mollah A, Shrivastava P, Das DK, et al. Nutritional status of adult Tuberculosis patients in Burdwan  
181 municipality area of West Bengal. *Indian Journal of Community Health* 2020;32:438-43.
- 182
- 183
