# Supplementary material for: Malnutrition assessment methods in adult patients with tuberculosis: a systematic review
Source: HighWire-hosted journal article supplement (doi:10.1136/bmjopen-2021-049777), 2021-12-01
Supplement: bmjopen-2021-049777supp003_data_supplement.pdf [file bmjopen-2021-049777supp003_data_supplement.pdf]

**Supplement Material 3:** Overview of validated malnutrition screening tools available in English language<sup>1</sup>

| Screening- tool                       | Characteristics                                                                                     | Target group                                |
|---------------------------------------|-----------------------------------------------------------------------------------------------------|---------------------------------------------|
| <b>MUST</b> <sup>2</sup>              | BMI, weight loss and acute disease effect                                                           | All adult patients                          |
| <b>PG-SGA Short Form</b> <sup>3</sup> | Weight loss, food intake, nutrition impact symptoms, physical activity                              | All adult patients                          |
| <b>SNAQ</b> <sup>4</sup>              | Weight loss, appetite, use of supplements/tube feeding                                              | Adult hospitalized patients                 |
| <b>MNA-SF</b> <sup>5</sup>            | Food intake, weight loss, mobility, psychological stress/acute disease, dementia or depression, BMI | Elderly patients                            |
| <b>SNAQ 65+</b> <sup>6</sup>          | Weight loss, MUAC, appetite, functionality                                                          | Elderly patients and/or rehabilitation care |
| <b>SNAQ RC</b> <sup>7</sup>           | Weight loss, dependence, appetite, BMI                                                              | Elderly patients in residential care        |
| <b>Nutric Score</b> <sup>8</sup>      | Age, comorbidity, days from hospital to ICU admittance, APACHE score, SOFA score                    | Adult intensive care                        |

**References**

1 Multidisciplinary Guidelines Malnutrition 2019. Available at: <https://www.stuurgroepondervoeding.nl/wp->. Accessed June/19, 2021.

2 Elia M. The 'MUST' report. Nutritional screening for adults: a multidisciplinary responsibility. Development and use of the 'Malnutrition Universal Screening Tool' (MUST) for adults. Worcs, United Kingdom: British Association for Parenteral and Enteral Nutrition (BAPEN) 2003.

3 Abbott J, Teleni L, McKavanagh D, et al. Patient-Generated Subjective Global Assessment Short Form (PG-SGA SF) is a valid screening tool in chemotherapy outpatients. *Support Care Cancer* 2016;24:3883-7 doi:10.1007/s00520-016-3196-0 [doi].

4 Kruizenga HM, Seidell JC, de Vet HC, et al. Development and validation of a hospital screening tool for malnutrition: the short nutritional assessment questionnaire (SNAQ). *Clin Nutr* 2005;24:75-82 doi:S0261-5614(04)00124-4 [pii].

5 Rubenstein LZ, Harker JO, Salva A, et al. Screening for undernutrition in geriatric practice: developing the short-form mini-nutritional assessment (MNA-SF). *J Gerontol A Biol Sci Med Sci* 2001;56:M366-72 doi:10.1093/gerona/56.6.m366 [doi].

6 Wijnhoven HA, Schilp J, van Bokhorst-de van der Schueren, M.A., et al. Development and validation of criteria for determining undernutrition in community-dwelling older men and women: The Short Nutritional Assessment Questionnaire 65+. *Clin Nutr* 2012;31:351-8 doi:10.1016/j.clnu.2011.10.013 [doi].

7 Kruizenga HM, de Vet HC, Van Marissing CM, et al. The SNAQ(RC), an easy traffic light system as a first step in the recognition of undernutrition in residential care. *J Nutr Health Aging* 2010;14:83-9.

8 Heyland DK, Dhaliwal R, Jiang X, et al. Identifying critically ill patients who benefit the most from nutrition therapy: the development and initial validation of a novel risk assessment tool. *Crit Care* 2011;15:R268 doi:10.1186/cc10546 [doi].
